# Supplementary material
Source: publisher site journal article supplement (https://www.e-cmh.org/upload/media/cmh-2023-0110-Supplementary-Table-7.pdf)
Supplement: Supplementary file 1 [file cmh-2023-0110-Supplementary-Table-7.pdf]

**Supplementary Table 7.** Cause of death among patients with hepatitis B

| Rank | Overall (n=19,481)        |               | Male (n=14,473)           |               | Female (n=5,008)          |               |
|------|---------------------------|---------------|---------------------------|---------------|---------------------------|---------------|
|      | Cause of death (KCD code) | Frequency (%) | Cause of death (KCD code) | Frequency (%) | Cause of death (KCD code) | Frequency (%) |
| 1    | C22                       | 54.1          | C22                       | 59.5          | C22                       | 38.5          |
| 2    | A00-B99                   | 5.7           | A00-B99                   | 4.8           | A00-B99                   | 8.0           |
| 3    | S00-T98                   | 3.8           | S00-T98                   | 3.9           | K74                       | 4.0           |
| 4    | C34                       | 3.2           | C34                       | 3.3           | C50                       | 3.4           |
| 5    | K74                       | 3.1           | K74                       | 2.8           | S00-T98                   | 3.2           |
| 6    | C16                       | 1.8           | K70                       | 1.9           | C34                       | 2.7           |
| 7    | C25                       | 1.8           | C16                       | 1.6           | C25                       | 2.6           |
| 8    | K70                       | 1.6           | C25                       | 1.5           | C16                       | 2.4           |
| 9    | C83                       | 1.5           | C83                       | 1.3           | C83                       | 2.0           |
| 10   | J18                       | 1.4           | J18                       | 1.3           | J18                       | 1.8           |

C22, Malignant neoplasm of liver and intrahepatic bile ducts; A00-B99, Certain infectious and parasitic diseases; S00-T98, Injury, poisoning and certain other consequences of external causes; C34, Malignant neoplasm of bronchus and lung; K74, Fibrosis and cirrhosis of liver; C16, Malignant neoplasm of stomach; C25, Malignant neoplasm of pancreas; K70, Alcoholic liver disease; C83, Non-follicular lymphoma; J18, Pneumonia, organism unspecified; C50, Malignant neoplasm of connective tissue of breast.
